# Supplementary material
Source: MDPI journal article supplement (https://www.mdpi.com/2072-4292/10/4/518)
Supplement: s1 [file s1]

## Supplementary Materials

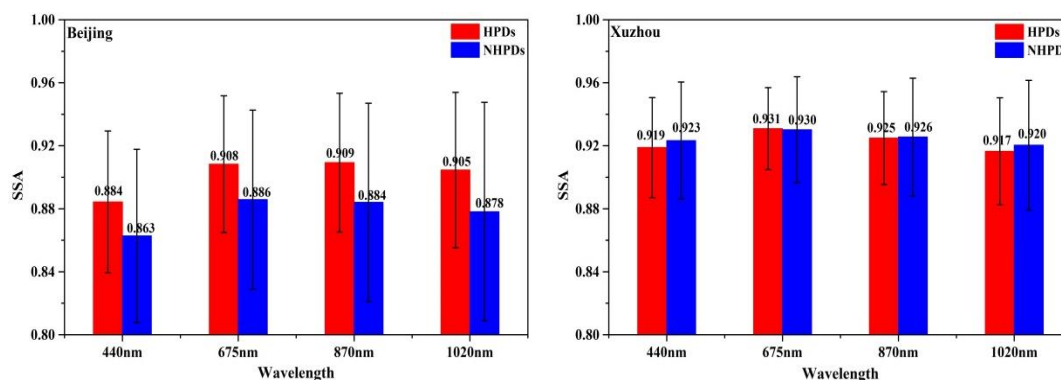

Figure S1. Averaged SSA with AOD<sub>440 nm</sub> > 0.4 on HPDs and NHPDs in Beijing and Xuzhou.

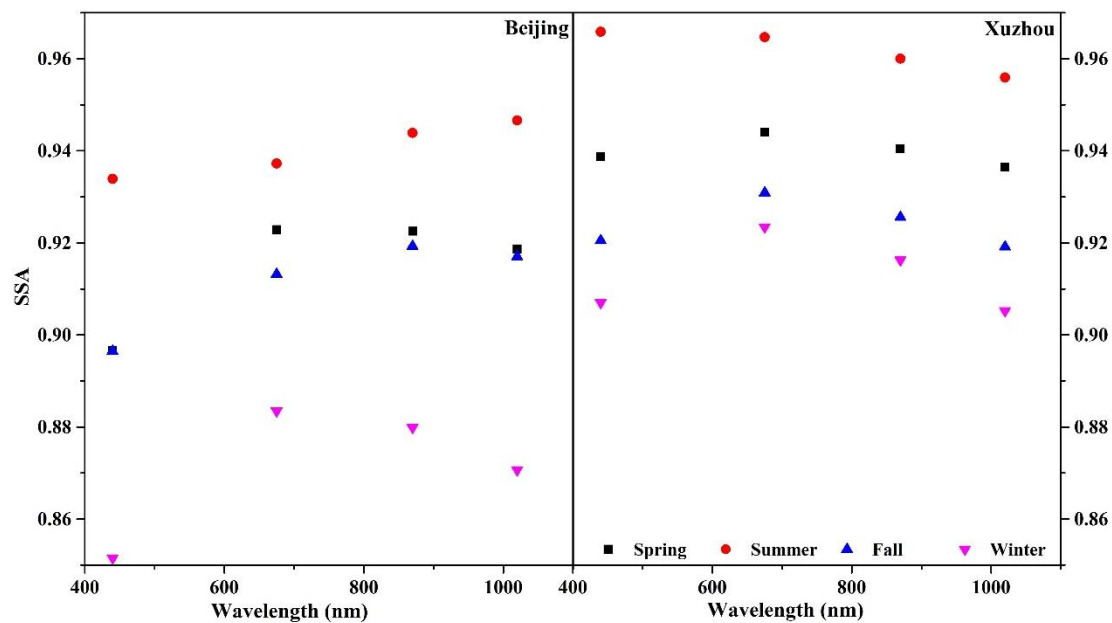

Figure S2. Seasonal averaged SSA with AOD<sub>440 nm</sub> > 0.4 on HPDs in Beijing and Xuzhou.

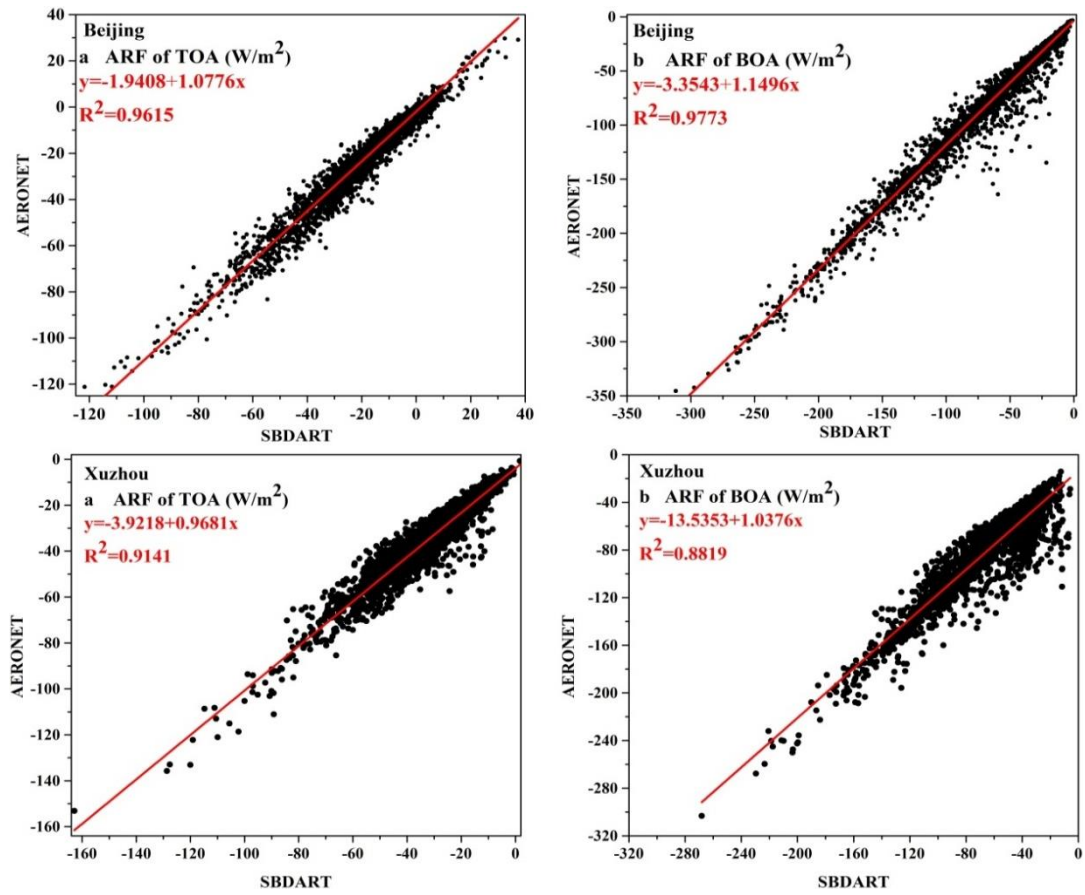

**Figure S3.** Comparison between SBDART-simulated and AERONET-retrieved direct aerosol radiative forcing.
